# Supplementary material for: Association between VEGF-A and VEGFR-2 polymorphisms and response to treatment of neovascular AMD with anti-VEGF agents: a meta-analysis
Source: PubMed Central journal article supplement — Br J Ophthalmol. 2017 Jun 22;101(7):976–84. doi: 10.1136/bjophthalmol-2016-309418 (PMC5530807; doi:10.1136/bjophthalmol-2016-309418), 2017-06-22

# 1. Five genetic models(subgroup analysis by ethnicity)

Rs699947 A>C

1) A/C

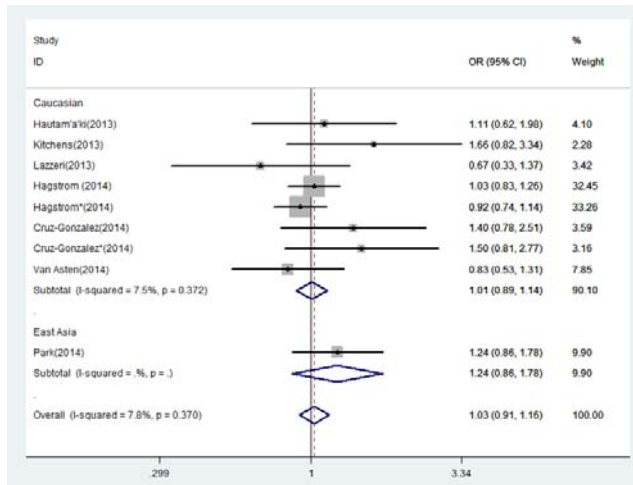

2) AA/CC

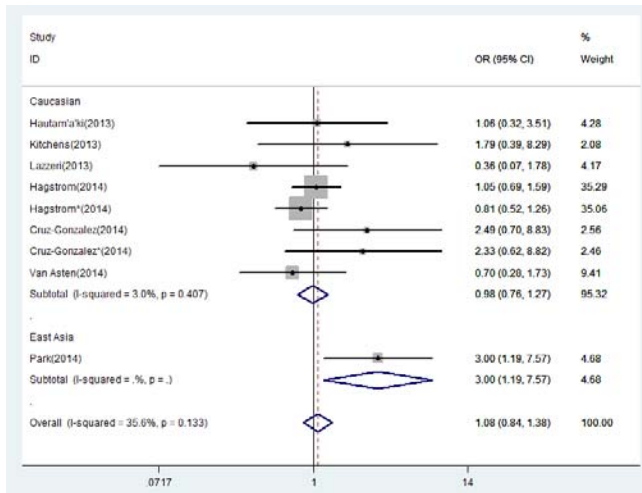

3) AC/CC

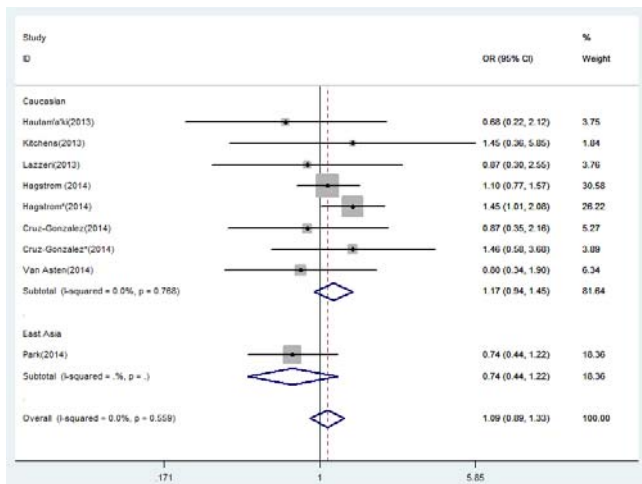

#### 4) AA/AC+CC

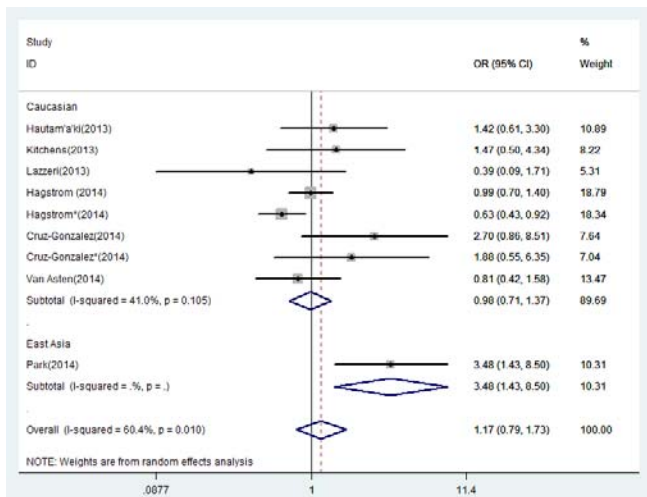

#### 5) AA+AC/ CC

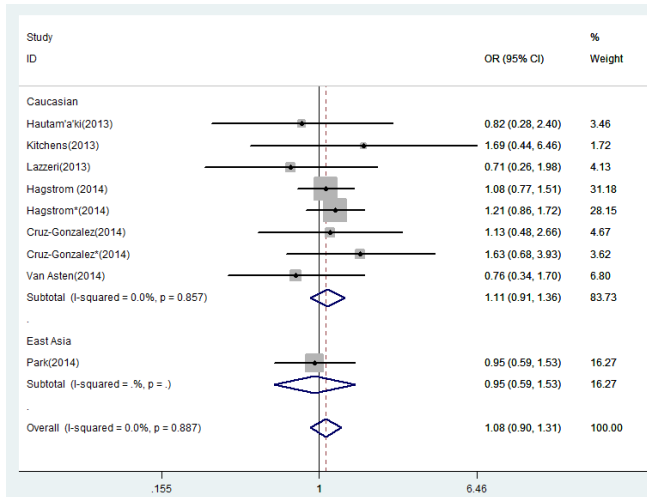

### Rs 833061 C>T

#### 1) C/T

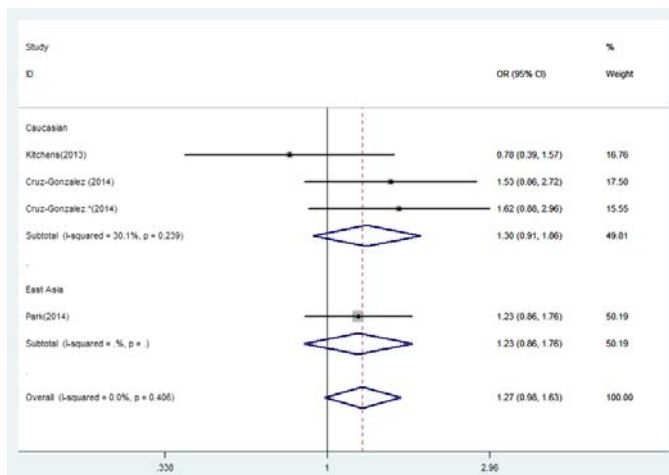

## 2) CC/TT

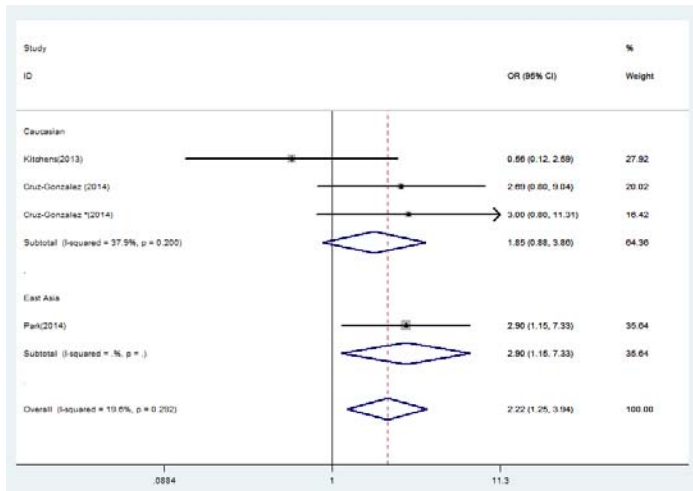

## 3) CT/TT

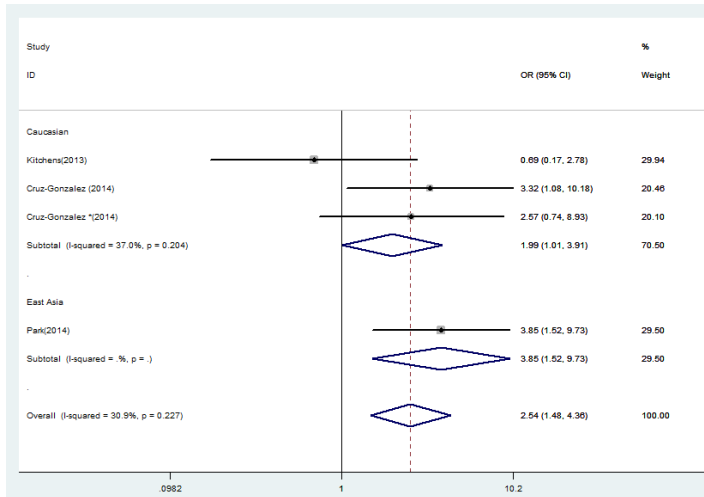

## 4) CC/CT+TT

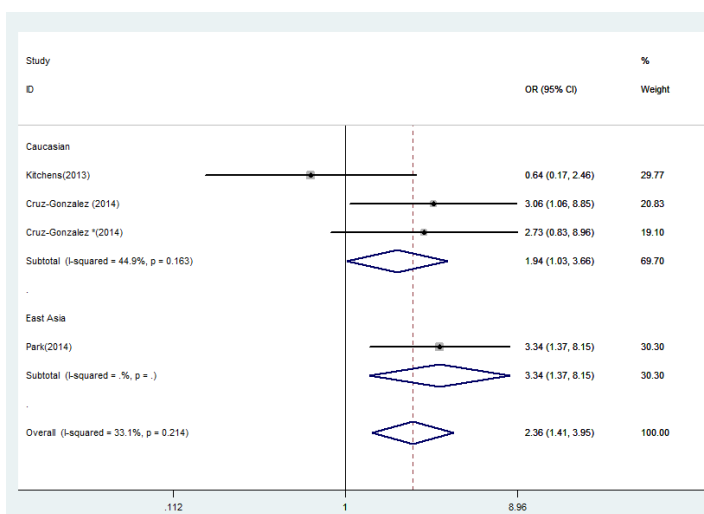

5) CC+CT/TT

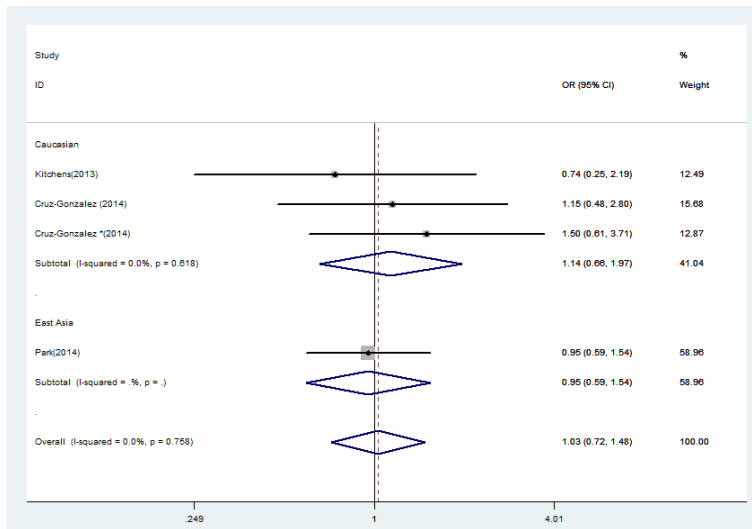

## 2. Sensitivity analysis (Table1)

Rs699947 A>C

1) A/C

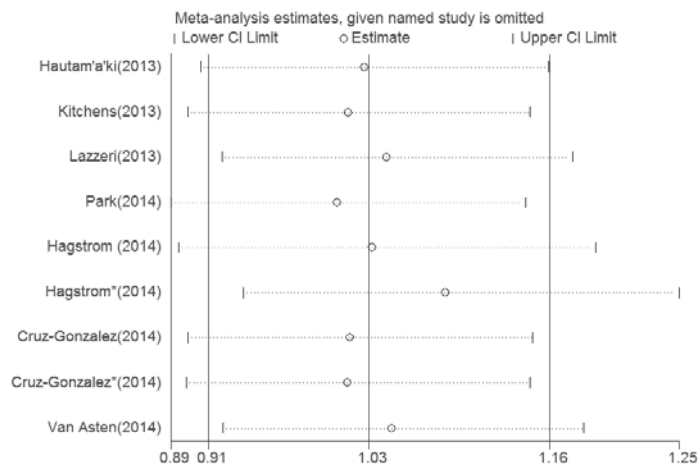

2) AC/CC

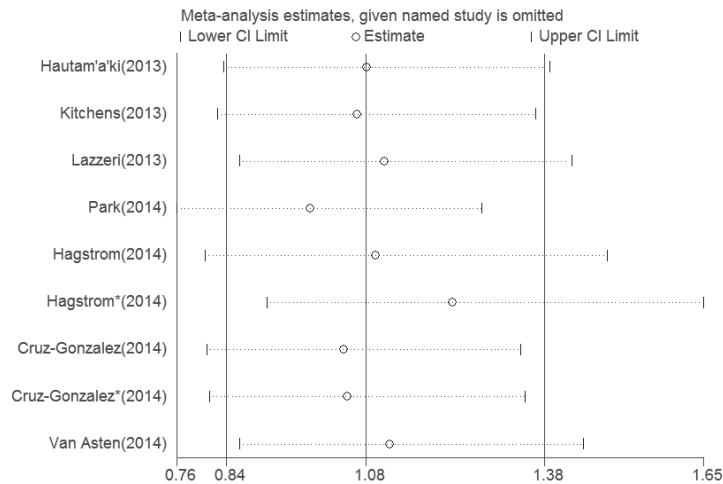

### 3) AA/CC

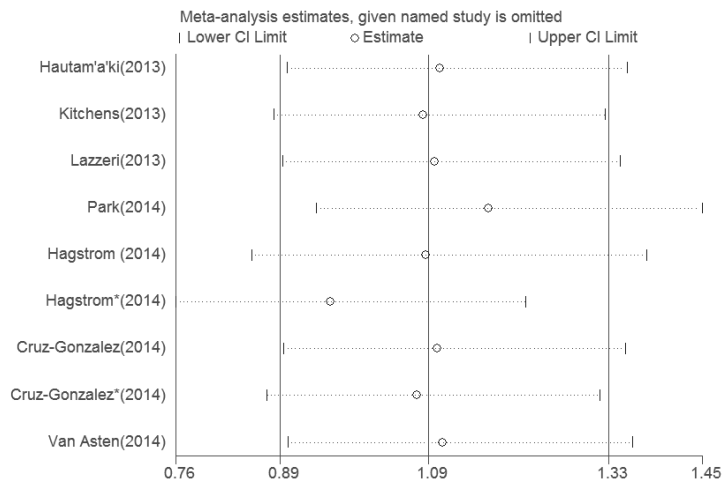

### 4) AC+AA/CC

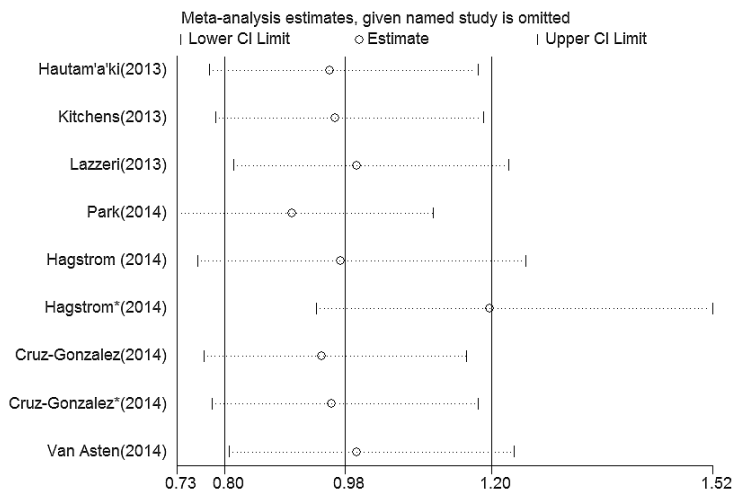

### 5) AA/AC+CC

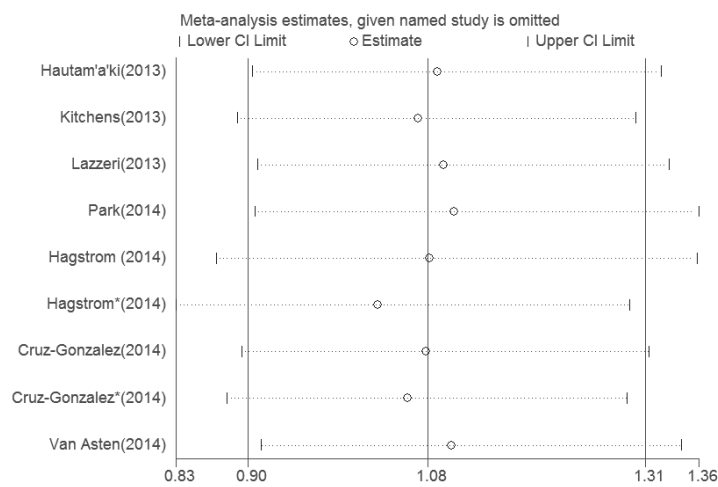

# Rs 833061 C>T

## 1) C/T

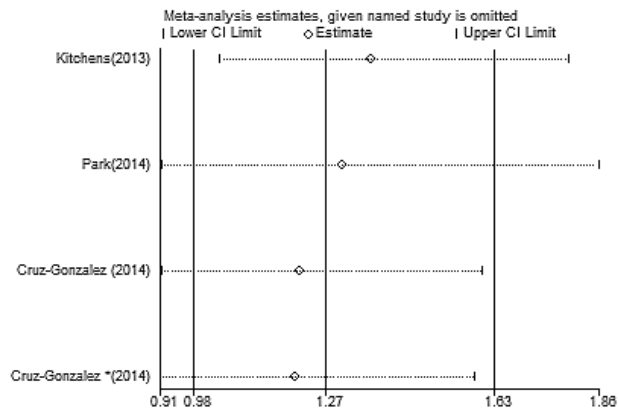

## 2) CC/TT

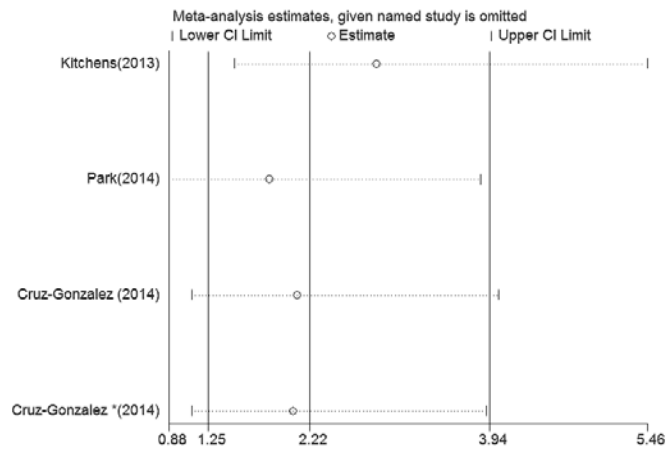

## 3) CT/TT

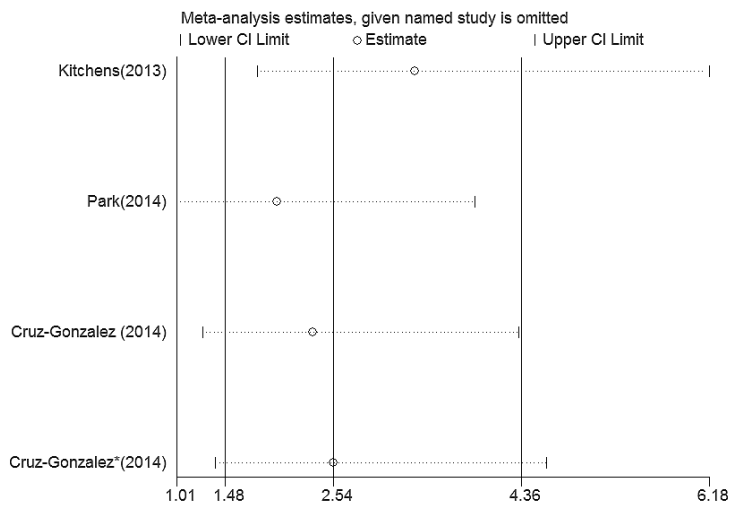

4) CC/CT+TT

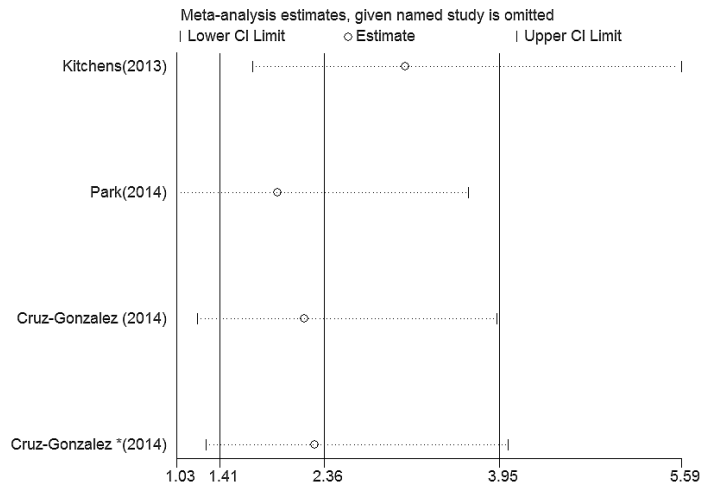

5) CC+CT/TT

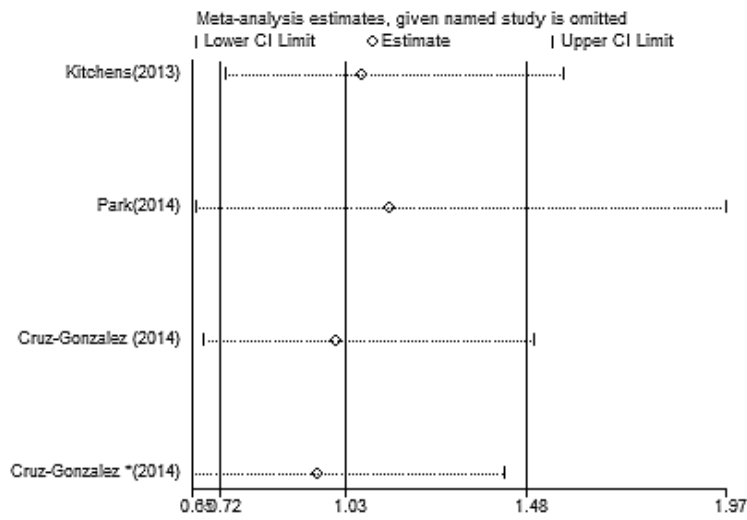

Rs 2071559 A>G

1) A/G

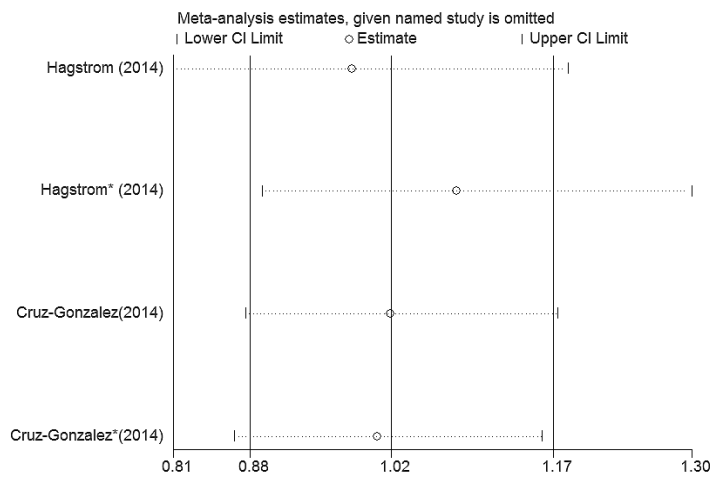

2) AA/GG

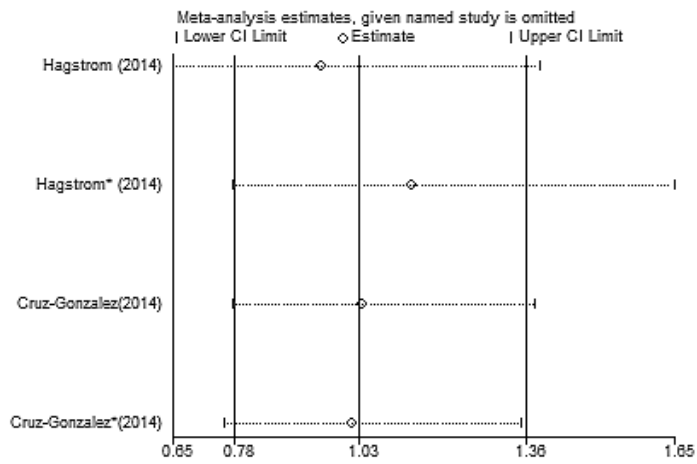

3) AG/GG

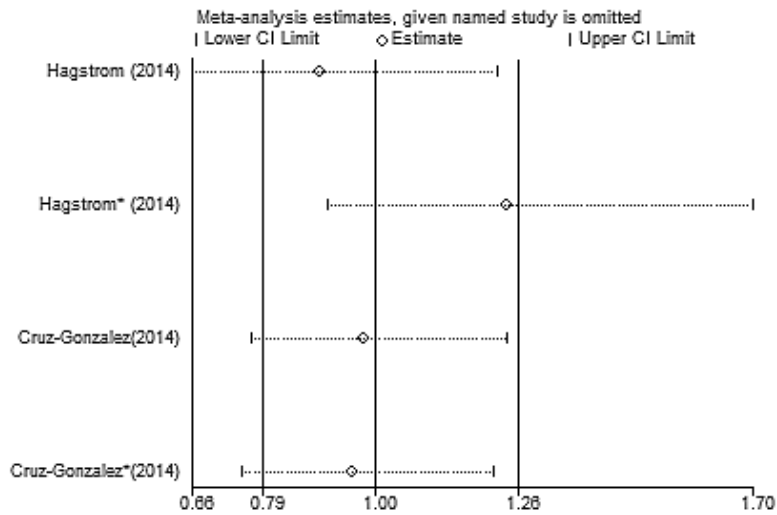

4) AA vs. AG+GG

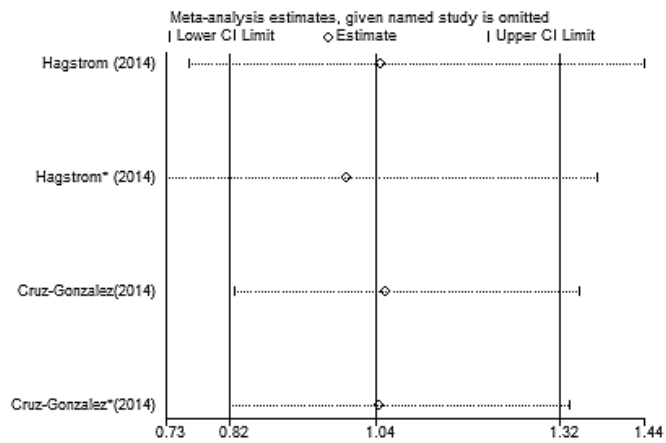



5) AA+AG vs. GG

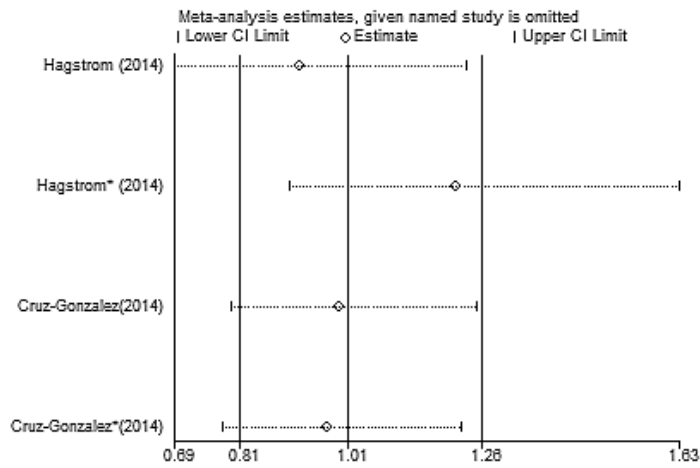

### 3. Publication bias

Rs699947 A>C

1) A/C

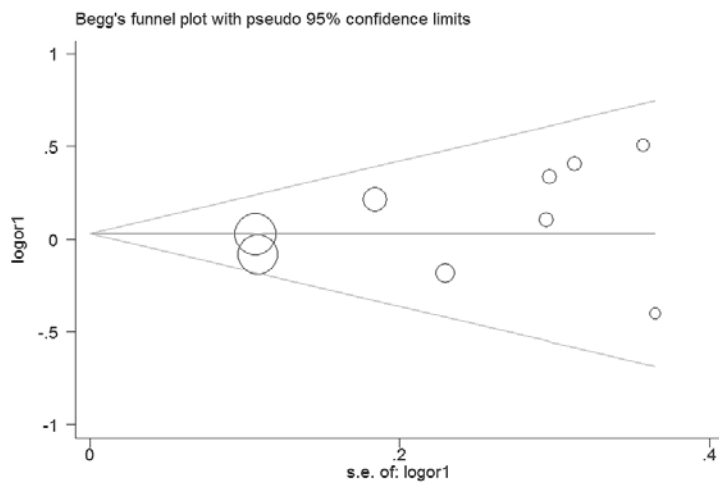

2) AA/CC

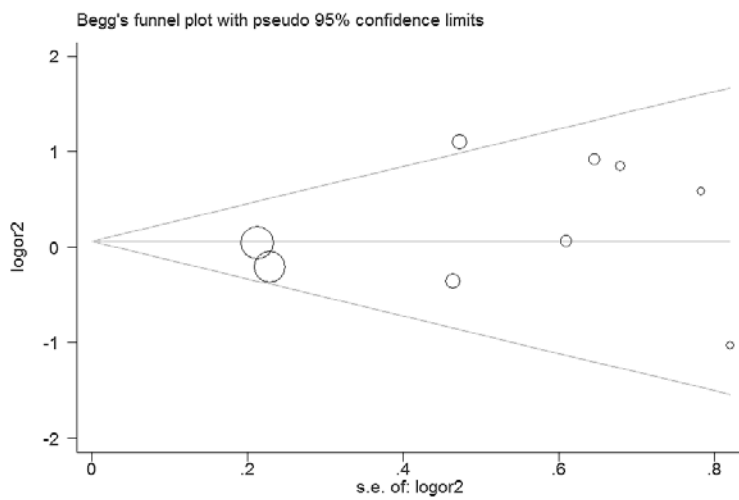

3) AC/CC

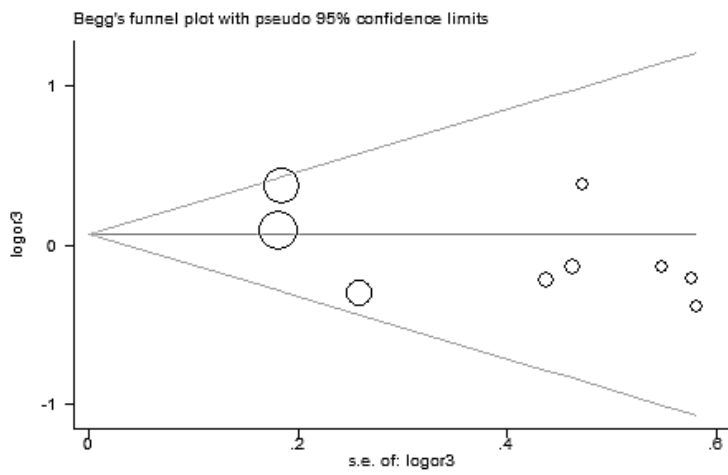

4) AA/AC+CC

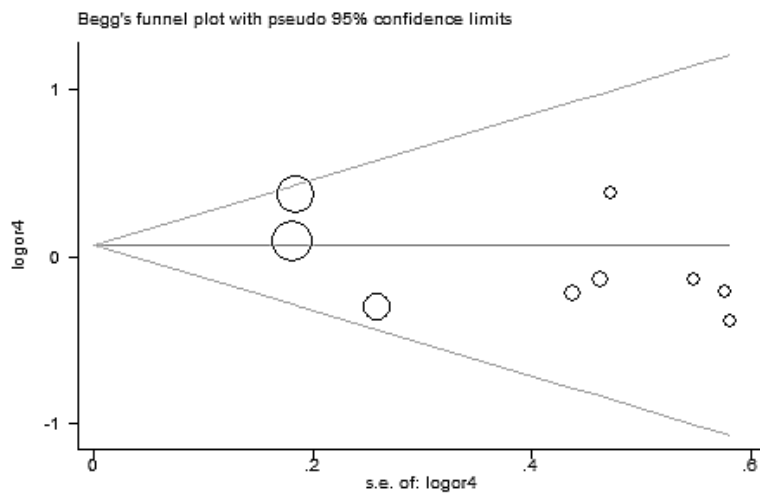

5) AA+AC/CC

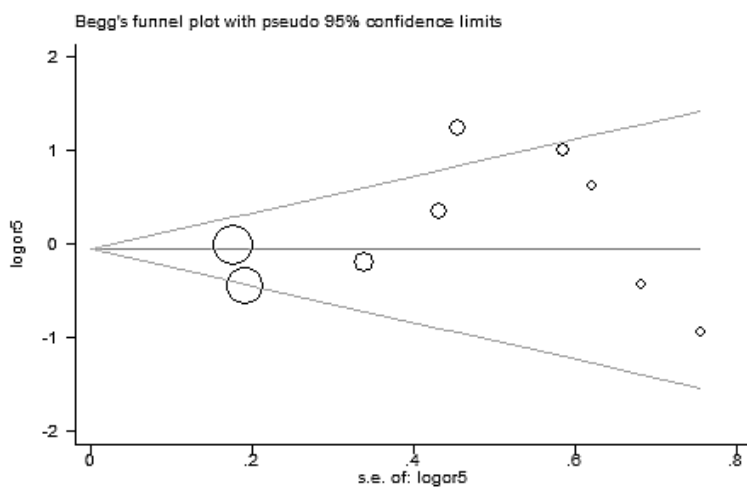

# Rs 833061 C>T

## 1) C/T

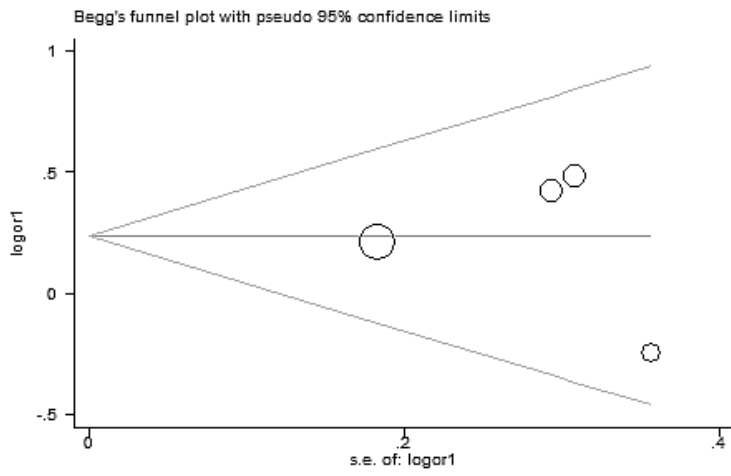

## 2) CC/TT

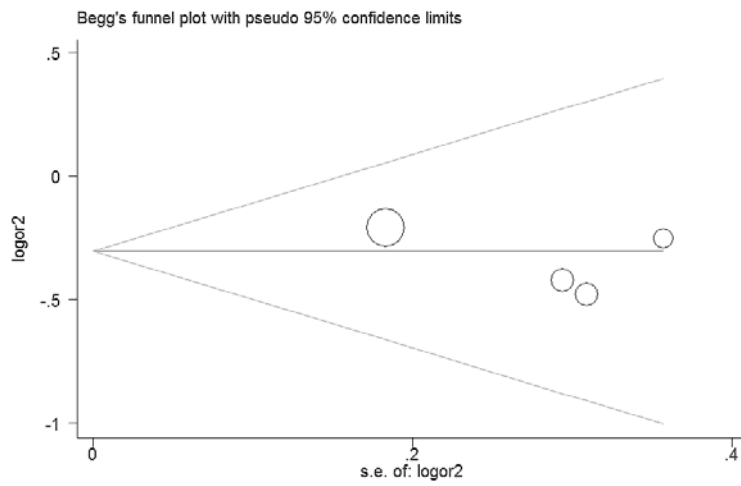

## 3) CT/TT

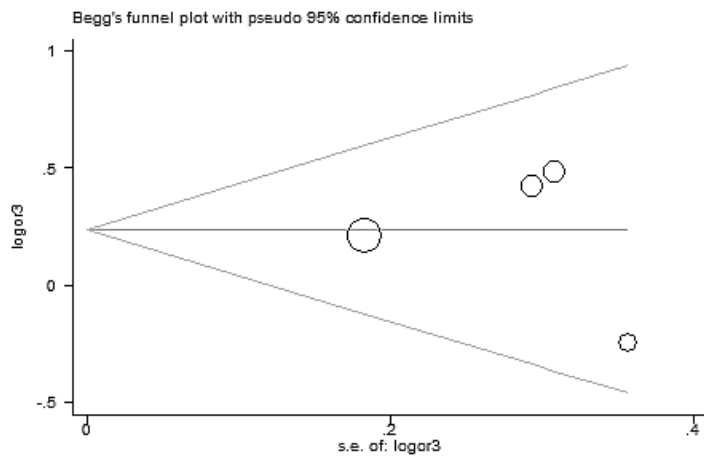

4) CC/CT+TT

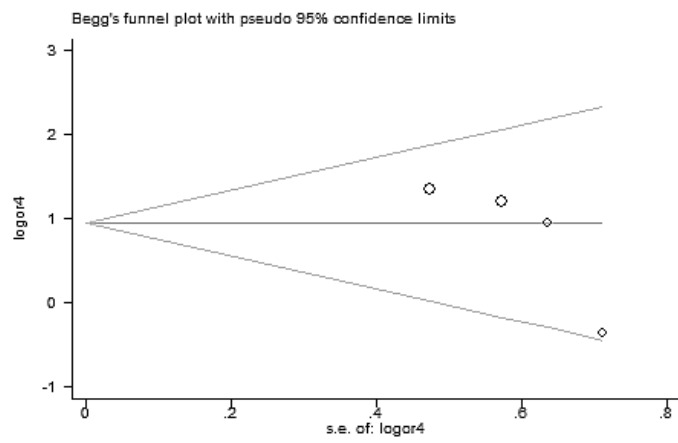

5) CC+CT/TT

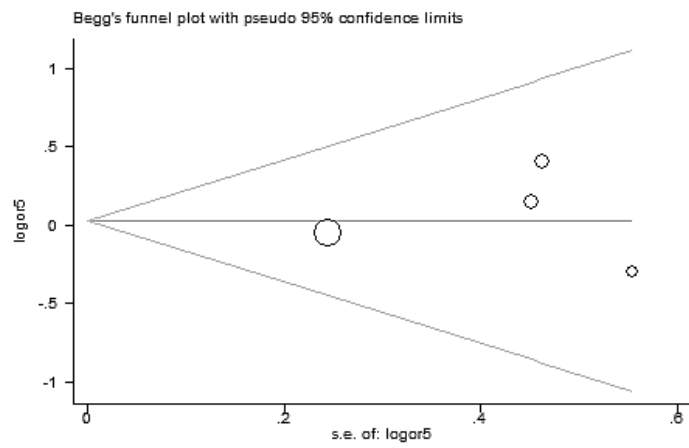

Supplement: bjophthalmol-2016-309418supp001.pdf [file bjophthalmol-2016-309418supp001.pdf]
